# Supplementary material
Source: PubMed Central journal article supplement (PMC6351176)
Supplement: NIHMS997071-supplement-Supp_info.pdf [file NIHMS997071-supplement-Supp_info.pdf]

## **SUPPORTING INFORMATION**

### **Cryptic protein interactions regulate DNA replication initiation**

Lindsay A. Matthews and Lyle A. Simmons\*

Molecular, Cellular, and Developmental Biology. University of Michigan, Ann Arbor, MI 48109-1048, USA.

\*Corresponding author: [lasimm@umich.edu](mailto:lasimm@umich.edu)

Running title: Cryptic interactions regulate replication initiation

## Supplementary Methods

**Building the *dnaD23* strain using CRISPR/Cas gene-editing.** Note that the sequences of all primers outlined in this section can be found in Table S1. The proto-spacer was created by annealing 50  $\mu\text{L}$  of 20  $\mu\text{M}$  oLM462 with 50  $\mu\text{L}$  of 20  $\mu\text{M}$  oLM463 and boiling for 10 minutes followed by slow cooling. The 5' ends of the annealed oligos were phosphorylated using T4 Polynucleotide Kinase (PNK) at 37°C for 30 minutes. PNK was heat inactivated at 65°C for 20 minutes. The pPB41 vector was digested with BsaI at 37°C for 20 minutes, followed by heat inactivation at 65°C for 20 minutes. The 5' phosphate groups from the vector were removed by treating with Calf Intestinal Phosphatase (CIP) at 37°C for 1 hour and gel purifying the digested vector. The proto-spacer was ligated into the prepared pPB41 vector using T4 DNA Ligase at room temperature for 2 hours. CaCl<sub>2</sub>-competent MC1061 cells were transformed with 10  $\mu\text{L}$  of the reaction and transformants were selected by plating on LB agar with 100  $\mu\text{g mL}^{-1}$  ampicillin.

The editing template (containing the A166T and silent mutations destroying the PAM site) was created using the primer extension method. Fragments of *dnaD* were amplified from PY79 genomic DNA in three pieces to introduce the mutations as follows: PCR1 (oLM468 and oLM465); PCR2 (oLM464 and oLM467); and PCR3 (oLM466 and oLM469). The amplified products were gel purified and mixed followed by amplifying with the flanking primers (oLM468 and oLM469) to make the completed template. The pPB41 vector containing the proto-spacer was amplified in two parts using primers oPEB217 and oPEB218 as well as oPEB232 and oPEB234 (see Table S1 for sequences). The amplified vector components were then assembled with the editing template using Gibson

assembly to make pLM190. Plasmids were isolated from single colonies and verified using the University of Michigan Sequencing Core (<https://seqcore.brcf.med.umich.edu/>).

To modify the *B. subtilis* genome, 1 µg of pLM190 was incubated with 200 µL of competent PY79 cells for 1 hour at 37°C. The cells were plated onto LB agar with 100 µg mL<sup>-1</sup> spectinomycin and incubated overnight at 30°C. Colonies were restreaked on LB agar with 100 µg mL<sup>-1</sup> spectinomycin and incubated for a second overnight at 30°C. Colonies were then restreaked on LB agar without antibiotics and incubated overnight at 37°C. As a final test, colonies were restreaked on both LB agar and LB agar with 100 µg mL<sup>-1</sup> spectinomycin overnight at 30°C and 48°C to find cells that are sensitive to spectinomycin and high temperatures. The final strain was incubated in 1 mL of LB media until an OD<sub>600</sub> of 1.0 and then mixed with 0.25 mL of 50% glycerol prior to flash freezing in liquid nitrogen and storage at -80°C.

**B2H using selective growth on minimal medium containing maltose.** Minimal media plates were prepared fresh on the day of the experiment. The plates consisted of 1X M63 media supplemented with 50 µg mL<sup>-1</sup> ampicillin, 25 µg mL<sup>-1</sup> kanamycin, 0.5 mM IPTG, 1 mM MgSO<sub>4</sub>, (5x10<sup>-5</sup>)% thiamine, 0.2% D-maltose, and 0.04% casamino acids. Co-transformants were streaked onto the minimal media plates in an “X” pattern and the plates were then incubated for 3 days at 30°C.



**Table S1 Continued**

| <b>Primer</b> | <b>Sequence (5'-3')</b>                                          |
|---------------|------------------------------------------------------------------|
| oLM203        | AGGATCCCCGGGTACCTAAGATGGCTGACTATTGGAAAGATGTACTGC                 |
| oLM204        | GACGGCCGAATTCTTAGTTAATAGGCAGAGTATTTTTTCAGTTTTTG<br>CATTCTTC      |
| oLM211        | CATAGCTGTTTCCTGTGTGAAATTGTTATCCGCTCACAATTCC                      |
| oLM212        | AGCTTGCATGCCTGCAGGTCGACTC                                        |
| oLM215        | TCACACAGGAAACAGCTATGCTTTATACCATTTTTGAGGAAGAGTTCGCA<br>AGACCG     |
| oLM216        | GACCTGCAGGCATGCAAGCTTTGTTCAAGCCAATTGTAAAAAGGAACCTG<br>CCTTTTATAC |
| oLM217        | CATAGCTGTTTCCTGTGTGAAATTGTTATCCGCTCACAATTC                       |
| oLM218        | AGCTTGCATGCCTGCAGGTCGACTC                                        |
| oLM308        | AGGATCCCCGGGTACCGAGCAATCTTCTGCTCACGCATTATAAA<br>CAGCTGGGC        |
| oLM309        | GATCCTAAGGAGGTATACATATGAAAAACAGCAATTTATTGATATGCA<br>GGAGCAGGG    |
| oLM310        | CCGCGGGAGCTCGGATCTTATTATTGTTCAAGCCAATTGTAAAAAGGA<br>ACCTGCC      |
| oLM327        | TCACACAGGAAACAGCTATGGCTGACTATTGGAAAGATGTACTGCC<br>TGTAGACC       |
| oLM328        | GACCTGCAGGCATGCAAGCTATCTTCTGAAATGGCCGGGTGCG                      |
| oLM348        | AGGATCCCCGGGTACCTAAGATGGAAAATATATTAGACCTGTG<br>GAACCAAGCCC       |
| oLM349        | GACGGCCGAATTCTTAGTTACTATTTAAGCTGTTCTTTAATTTCT<br>TTTACATGCTGCTG  |
| oLM355        | GACCTGCAGGCATGCAAGCTATAGGCAGAGTATTTTTTCAGTTTTTG<br>CATTCTTCC     |
| oLM360        | GGATCATATGCTCCTACACCGAATCAGCTG                                   |
| oLM361        | CAGCTGATTCGGTGTAGGAGCATATGATCC                                   |
| oLM365        | GACGGCCGAATTCTTAGTTATTGAGGAATGACAACTTAATGCT<br>CAATTCTTCCCC      |
| oLM368        | AGGATCCCCGGGTACCTAAGATGCTCAATCCAAAATATACTTTTG<br>ATACTTTTGTATC   |
| oLM369        | GACGGCCGAATTCTTAGTTATGAATAAGCGACAACCTCTGATTAAT<br>GCTCCTTCG      |
| oLM371        | AGGATCCCCGGGTACCTAAGGCTGATCTGGCCGCTGAGGC                         |

**Table S1 Continued**

| <b>Primer</b> | <b>Sequence (5'-3')</b>                                          |
|---------------|------------------------------------------------------------------|
| oLM372        | TCACACAGGAAACAGCTATGCTTGCCGAGGGGTCCGAGTATACTTC                   |
| oLM373        | GACCTGCAGGCATGCAAGCTTTGTTGCGCTTCACGCAGATGCAC                     |
| oLM376        | TCACACAGGAAACAGCTATGGAAGAGGATTCTCTGGATGGGAAGCTG<br>ATTGC         |
| oLM397        | GCGAACAGATTGGAGGTATGGAAAATATATTAGACCTGTGGAACCAAG<br>CCCTTGCTC    |
| oLM398        | GTGGTGGTGGTGGCTCGATTATTGAGGAATGACAACTTAATGCTCAAT<br>TCTTCCCG     |
| oLM421        | ACAGAGAACAGATTGGTGGAAATCTTCTGCTCACGCATTATAAACAGC<br>TTGGGC       |
| oLM422        | ACAGAGAACAGATTGGTGGAAATGGCTGACTATTGGAAAGATGTACTGCCTG             |
| oLM423        | AGCTCGAATTCGGATTATTAATCTTCTGAAATGGCCGGGTGCG                      |
| oLM462        | AAACTCAGGAAAACCTCAGTTTCCGCTACATTGACG                             |
| oLM463        | AAAACGTCAATGTAGCGGAAACTGAGTTTTCTGA                               |
| oLM464        | GCACAACCTGATCAAACACACGTTAAAAGAGGCTG                              |
| oLM465        | CAGCCTCTTTTAACGTGTGTTTGATCAGTTGTGC                               |
| oLM466        | CTCAGTTTCCGCTACATTGATAGAATTTTGTGTTGAATGGAAG                      |
| oLM467        | CTTCCATTCAAACAAAATTCTATCAATGTAGCGGAAACTGAG                       |
| oLM468        | CTGAATTCGTAATGAGGTTTCATGAAAAACAGCAATTTATTGATATGCA<br>GGAGCAGGG   |
| oLM469        | ACCAAGCCTATGCCTACAGCACTCCAGAACCGAGTCCTTCCACCG                    |
| oLM482        | TTATTGAAGAATGCGGCTCATTTGAGAAATATTCTTTCAGCCTT<br>TATGGGGCAAGC     |
| oLM483        | GAATATTTCTCAAATGAGCCGCATTCTTCAATAAACAGAAAGCCTT<br>TTTGAATAAACATC |
| oLM492        | GCAAACCGAGTTTTGAGGCTTGGATGAAGTC                                  |
| oLM493        | GACTTCATCCAAGCCTCAAACTCGGTTTGC                                   |
| oLM494        | CCGAGTTTTGAGACTGCGATGAAGTCAACC                                   |
| oLM495        | GGTTGACTTCATCGCAGTCTCAAACTCGG                                    |

**Table S1 Continued**

| <b>Primer</b> | <b>Sequence (5'-3')</b>                                           |
|---------------|-------------------------------------------------------------------|
| oLM496        | CCCAATGAAGCTGCCAGAGACTGGC                                         |
| oLM497        | GCCAGTCTCTGGCAGCTTCATTGGG                                         |
| oLM509        | CAAACCGAGTTTTGAGTCTTGGATGAAGTCAACC                                |
| oLM510        | GGTTGACTTCATCCAAGACTCAAAACTCGGTTTG                                |
| oLM511        | CGGCTCCCGCTGAATTTGCCAG                                            |
| oLM512        | CTGGCAAATTCAGCGGGAGCCG                                            |
| oLM519        | CAAAAAGGCTTTCTGTTTGCTGAAGAATGCGAGGATC                             |
| oLM520        | GATCCTCGCATTCTTCAGCAAACAGAAAGCCTTTTTG                             |
| oLM521        | CAGATTGCGGATGTTTGCTCAAAAAGGCTTTCTGTTTATTG                         |
| oLM522        | CAATAAACAGAAAGCCTTTTTGAGCAAACATCCGCAATCTG                         |
| oLM525        | GATCCTAAGGAGGTATACATATGAATCTTCTGCTCACGCATTATAACA<br>GCTTGGG       |
| oLM546        | GGCTCCCAATGAATATGCCAGAGACTGGC                                     |
| oLM547        | GCCAGTCTCTGGCATATTCATTGGGAGCC                                     |
| oLM548        | GGCTCCCAATGAATTTGTCAGAGACTGGC                                     |
| oLM549        | GCCAGTCTCTGACAAATTCATTGGGAGCC                                     |
| oLM578        | TCACACAGGAAACAGCTATGGAACCAATCGGCCGTTCCCTGC                        |
| oLM579        | GACCTGCAGGCATGCAAGCTCTGGATATACATGCTTTTCATAAGAGAC<br>TGTTGTTTCTTC  |
| oLM582        | TCACACAGGAAACAGCTATGCAGGATCTTCTTGGAGCGACGTTCC                     |
| oLM583        | GACCTGCAGGCATGCAAGCTTGGATGTCGGCGGTTTTCTCCG                        |
| oLM590        | AGGATCCCCGGGTACCTAAGATGTCGGAAAAAGAAATTTGGGAAAAAG<br>TGCTTG        |
| oLM591        | GACGGCCGAATTCCTTAGTTATAATTCTTCAGTAGTAATAAAGTGAGGTTT<br>AACTTCATAG |
| oLM592        | GCTGTAAGTTACTCAGCGTTCCTAAAAGATACTGAGCTTTACAC                      |

**Table S1 Continued**

| <b>Primer</b> | <b>Sequence (5'-3')</b>                                        |
|---------------|----------------------------------------------------------------|
| oLM593        | GTGTAAAGCTCAGTATCTTTTAGGAACGCTGAGTAACTTACAGC                   |
| oLM594        | CTGTAAGTTACTCAACTGCGCTAAAAGATACTGAGCTTTAC                      |
| oLM595        | GTAAAGCTCAGTATCTTTTAGCGCAGTTGAGTAACTTACAG                      |
| oLM596        | GTATTATCGAGTATTCTGCGAATGCAAATTGGTTAAATCAACAATATG               |
| oLM597        | CATATTGTTGATTTAACCAATTTGCATTGCGAGGAATACTCGATAATAC              |
| oLM600        | AGGATCCCCGGGTACCGAGCATGGATAAATATCAATTAAGCAAGA<br>CCTGTAGTGATAC |
| oLM601        | TGCACCATATACTTAGTTATTGTTTAAATTTTTCTTACTATTTAGCTC<br>TTTCGTTTCC |
| oLM602        | AGGATCCCCGGGTACCTAAGATGTCACCTTCGCTTTGGCAGCAGTG                 |
| oLM603        | GACGGCCGAATTCTTAGTTATGCCGCTTGTGGCGTTTGC                        |
| oLM606        | GCAAACCGAGTTTTGAGATGTGGATGAAGTCAACCAAAGCCCACTC                 |
| oLM607        | TTGGTTGACTTCATCCACATCTCAAACTCGGTTTGCTCAACTTTTTTTTCG            |
| oLM634        | AGGATCCCCGGGTACCGAGCATGGCTGACTATTGGAAAGATGTA CTGC<br>CTGTAG    |
| oLM635        | TGCACCATATACTTAGTTAATCTTCTGAAATGGCCGGGTGCGTAAAAA<br>ATTG       |
| oLM636        | AGGATCCCCGGGTACCGAGCCTTGCCGAGGGGTCCGAGTATACTTCTG               |
| oLM637        | TGCACCATATACTTAGTTATTGTTTCGCTTCACGCAGATGCACCG                  |
| oLM638        | AGGATCCCCGGGTACCGAGCGAAGAGGATTCTCTGGATGGGAAGCTGA<br>TTGC       |
| oLM639        | TGCACCATATACTTAGTTAATAGGCAGAGTATTTTTTCAGTTTTTGCAT<br>TTCTTCC   |
| oLM640        | AGGATCCCCGGGTACCGAGCATGGAACCAATCGGCCGTTCCCTG                   |
| oLM641        | TGCACCATATACTTAGTTACTGGATATACATGCTTTTCATAAGAGACTG<br>TTGTTTC   |
| oLM642        | AGGATCCCCGGGTACCGAGCCAGGATCTTCTTGAGCGACGTTCCAG                 |
| oLM643        | TGCACCATATACTTAGTTATGGATGTCGGCGGTTTTCTCCGTC                    |
| oLM644        | ATTTACACAGGAAACAGCTATGAAAAACAGCAATTTATTGATATGCA<br>GGAGCAGGG   |



**Table S1 Continued**

| <b>Primer</b> | <b>Sequence (5'-3')</b>                             |
|---------------|-----------------------------------------------------|
| oLM645        | GACCTGCAGGCATGCAAGCTGCTTTTTTGTTCCTTCTGCTTTTCTTTCCTG |
| oPEB217       | GAACCTCATTACGAATTCAGCATGC                           |
| oPEB218       | GAATGGCGATTTTCGTTTCGTGAATAC                         |
| oPEB232       | GCTGTAGGCATAGGCTTGGTTATG                            |
| oPEB234       | GTATTCACGAACGAAAATCGCCATTCCTAGCAGCACGCCATAGTGACTG   |
| oJS638        | TAATAATCCGAATTCGAGCTCCGTCGAC                        |
| oJS639        | TCCACCAATCTGTTCTCTGTGAGCC                           |

**Table S2. Plasmid List for B2H Assay**

| <b>Plasmid</b>         | <b>Vector</b> | <b>Description<sup>†</sup></b>                               | <b>Primers<sup>‡</sup></b>                            |
|------------------------|---------------|--------------------------------------------------------------|-------------------------------------------------------|
| <b>BsDnaA Plasmids</b> |               |                                                              |                                                       |
| pLM137                 | pKT25         | DnaA <sup>FL</sup> (1-446)                                   | oLM348 + oLM349                                       |
| pLM146                 | pKT25         | DnaA <sup>DI</sup> (1-82)                                    | oLM348 + oLM365                                       |
| pLM148                 | pKT25         | DnaA <sup>DIII</sup> (111-326)                               | oLM368 + oLM369                                       |
| pLM150                 | pKT25         | DnaA <sup>DIV</sup> (335-446)                                | oLM371 + oLM349                                       |
| pLM211                 | pKT25         | DnaA <sup>DI</sup> T26A (1-82)                               | (oLM348 + oLM493) +<br>(oLM492 + oLM365) <sup>§</sup> |
| pLM212                 | pKT25         | DnaA <sup>DI</sup> W27A (1-82)                               | (oLM348 + oLM495) +<br>(oLM494 + oLM365) <sup>c</sup> |
| pLM213                 | pKT25         | DnaA <sup>DI</sup> F49A (1-82)                               | (oLM348 + oLM497) +<br>(oLM496 + oLM365) <sup>§</sup> |
| pLM220                 | pKT25         | DnaA <sup>DI</sup> T26S (1-82)                               | (oLM348 + oLM510) +<br>(oLM509 + oLM365) <sup>§</sup> |
| pLM221                 | pKT25         | DnaA <sup>DI</sup> N47A (1-82)                               | (oLM348 + oLM512) +<br>(oLM511 + oLM365) <sup>§</sup> |
| pLM246                 | pKT25         | DnaA <sup>DI</sup> F49Y (1-82)                               | (oLM348 + oLM547) +<br>(oLM546 + oLM365) <sup>§</sup> |
| pLM247                 | pKT25         | DnaA <sup>DI</sup> A50V (1-82)                               | (oLM348 + oLM549) +<br>(oLM548 + oLM365) <sup>§</sup> |
| pLM268                 | pKT25         | DnaA <sup>DI</sup> T26M (1-82)                               | (oLM348 + oLM607) +<br>(oLM606 + oLM365) <sup>§</sup> |
| <b>BsDnaD Plasmids</b> |               |                                                              |                                                       |
| pLM60                  | pKT25         | DnaD <sup>WHD</sup> (1-128)                                  | oLM148 + oLM176                                       |
| pLM63                  | pUT18C        | DnaD <sup>FL</sup> (1-232)                                   | oLM180 + oLM181                                       |
| pLM64                  | pUT18C        | DnaD <sup>WHD</sup> (1-128)                                  | oLM180 + oLM182                                       |
| pLM65                  | pUT18C        | DnaD <sup>CTD</sup> (129-232)                                | oLM183 + oLM181                                       |
| pLM83                  | pKNT25        | DnaD <sup>CTD</sup> (129-232)                                | oLM215 + oLM216                                       |
| pLM113                 | pUT18C        | DnaD <sup>WHD</sup> ΔNT <sub>ext</sub> (19-128)              | oLM308 + oLM182                                       |
| pLM197                 | pUT18C        | DnaD <sup>WHD</sup> F51A (1-128)                             | (oLM180 + oLM361) +<br>(oLM360 + oLM182) <sup>§</sup> |
| pLM198                 | pUT18C        | DnaD <sup>WHD</sup> ΔLoop (1-128; Δ87-93 replaced with "GS") | (oLM180 + oLM483) +<br>(oLM482 + oLM182) <sup>§</sup> |
| pLM225                 | pUT18C        | DnaD <sup>WHD</sup> I83A (1-128)                             | (oLM180 + oLM520) +<br>(oLM519 + oLM182) <sup>§</sup> |
| pLM224                 | pUT18C        | DnaD <sup>WHD</sup> I76A (1-128)                             | (oLM180 + oLM522) +<br>(oLM521 + oLM182) <sup>§</sup> |
| pLM280                 | pKNT25        | DnaD <sup>WHD</sup> (1-128)                                  | oLM644 + oLM645                                       |
| <b>BsDnaB Plasmids</b> |               |                                                              |                                                       |
| pLM72                  | pKT25         | DnaB <sup>FL</sup> (1-472)                                   | oLM203 + oLM204                                       |
| pLM120                 | pKNT25        | DnaB <sup>WHD</sup> (1-153)                                  | oLM327 + oLM328                                       |

**Table S2 Continued**

| <b>Plasmid</b>         | <b>Vector</b> | <b>Description<sup>†</sup></b>   | <b>Primers<sup>‡</sup></b>                                            |
|------------------------|---------------|----------------------------------|-----------------------------------------------------------------------|
| pLM151                 | pKNT25        | DnaB <sup>CTD1</sup> (185-300)   | oLM372 + oLM373                                                       |
| pLM153                 | pKNT25        | DnaB <sup>CTD2</sup> (303-472)   | oLM376 + oLM355                                                       |
| pLM277                 | pUT18C        | DnaB <sup>WHD</sup> (1-153)      | oLM634 + oLM635                                                       |
| oLM278                 | pUT18C        | DnaB <sup>CTD1</sup> (185-300)   | oLM636 + oLM637                                                       |
| oLM279                 | pUT18C        | DnaB <sup>CTD2</sup> (303-472)   | oLM638 + oLM639                                                       |
| <b>BsDnaI Plasmids</b> |               |                                  |                                                                       |
| pLM266                 | pKNT25        | DnaI <sup>ZBD</sup> (1-123)      | oLM578 + oLM579                                                       |
| pLM267                 | pKNT25        | DnaI <sup>CTD</sup> (124-311)    | oLM582 + oLM583                                                       |
| pLM275                 | pUT18C        | DnaI <sup>ZBD</sup> (1-123)      | oLM640 + oLM641                                                       |
| pLM276                 | pUT18C        | DnaI <sup>CTD</sup> (124-311)    | oLM642 + oLM643                                                       |
| <b>SaDnaA Plasmids</b> |               |                                  |                                                                       |
| pLM269                 | pKT25         | SaDnaA <sup>DI</sup> (1-83)      | oLM590 + oLM591                                                       |
| pLM270                 | pKT25         | SaDnaA <sup>DI</sup> T25A (1-83) | ( <b>oLM590</b> + oLM593) +<br>(oLM592 + <b>oLM591</b> ) <sup>§</sup> |
| pLM271                 | pKT25         | SaDnaA <sup>DI</sup> F26A (1-83) | ( <b>oLM590</b> + oLM595) +<br>(oLM594 + <b>oLM591</b> ) <sup>§</sup> |
| pLM272                 | pKT25         | SaDnaA <sup>DI</sup> F48A (1-83) | ( <b>oLM590</b> + oLM597) +<br>(oLM596 + <b>oLM591</b> ) <sup>§</sup> |
| <b>SaDnaD Plasmids</b> |               |                                  |                                                                       |
| pLM273                 | pUT18C        | SaDnaD <sup>WHD</sup> (1-124)    | oLM600 + oLM601                                                       |
| <b>EcDnaA Plasmids</b> |               |                                  |                                                                       |
| pLM274                 | pKT25         | EcDnaA <sup>DI</sup> (1-90)      | oLM602 + oLM603                                                       |

<sup>†</sup>Amino acid range for each protein fragment is indicated in the brackets.

<sup>‡</sup>Primer pairs used to amplify the gene fragments are provided (see Table S1 for primer sequences).

<sup>§</sup>The primer extension method was used for site-directed mutagenesis. Primer pairs used in the first round of PCR are grouped together within the bracket, while the flanking primers used in the second round of PCR are in bold. See methods section for more details.

**Table S3. Plasmids Used to Integrate *dnaD* Variants at the *amyE* Locus**

| <b>Plasmid</b> | <b>Description</b>      | <b>Primers<sup>†</sup></b>                                            |
|----------------|-------------------------|-----------------------------------------------------------------------|
| pLM114         | DnaD <sup>FL</sup>      | oLM309 + oLM310                                                       |
| pLM238         | DnaD <sup>FL</sup> F51A | ( <b>oLM309</b> + oLM361) +<br>(oLM360 + <b>oLM310</b> ) <sup>‡</sup> |
| pLM237         | DnaD <sup>FL</sup> I83A | ( <b>oLM309</b> + oLM520) +<br>(oLM519 + <b>oLM310</b> ) <sup>‡</sup> |

<sup>†</sup>Primer pairs used to amplify the gene fragments are provided (see Table S1 for primer sequences).

<sup>‡</sup>The primer extension method was used for site-directed mutagenesis. Primer pairs used in the first round of PCR are grouped together within the bracket, while the flanking primers used in the second round of PCR are in bold. See methods section for more details.

**Table S4. Plasmids Used for Protein Purifications**

| <b>Plasmid</b> | <b>Description</b>               | <b>Primers<sup>†</sup></b>                                            |
|----------------|----------------------------------|-----------------------------------------------------------------------|
| pLM2           | DnaD <sup>CTD</sup> (129-232)    | oLM5 + oLM6                                                           |
| pLM8           | DnaD <sup>WHD</sup> (1-128)      | oLM29 + oLM30                                                         |
| pLM45          | DnaB <sup>CTD2</sup> (303-472)   | oLM126 + oLM127                                                       |
| pLM47          | DnaB <sup>CTD1</sup> (185-300)   | oLM129 + oLM125                                                       |
| pLM165         | DnaA <sup>DI</sup> (1-82)        | oLM397 + oLM398                                                       |
| pLM175         | DnaD <sup>WHD</sup> ΔNT (19-128) | oLM421 + oLM30                                                        |
| pLM176         | DnaB <sup>WHD</sup> (1-153)      | oLM422 + oLM423                                                       |
| pLM241         | DnaD <sup>WHD</sup> F51A (1-128) | ( <b>oLM29</b> + oLM361) +<br>(oLM360 + <b>oLM30</b> ) <sup>‡</sup>   |
| pLM240         | DnaD <sup>WHD</sup> I83A (1-128) | ( <b>oLM29</b> + oLM520) +<br>(oLM519 + <b>oLM30</b> ) <sup>‡</sup>   |
| pLM281         | DnaA <sup>DI</sup> F49A (1-82)   | ( <b>oLM397</b> + oLM497) +<br>(oLM496 + <b>oLM398</b> ) <sup>‡</sup> |

<sup>†</sup>Primer pairs used to amplify the gene fragments are provided (see Table S1 for primer sequences).

<sup>‡</sup>The primer extension method was used for site-directed mutagenesis. Primer pairs used in the first round of PCR are grouped together within the bracket, while the flanking primers used in the second round of PCR are in bold. See methods section for more details.

**Table S5. *B. subtilis* strains used in this study**

| <b>Strain Name</b> | <b>Genotype</b>                                         | <b>Ectopically Expressed Protein</b> | <b>Source</b>                                                            |
|--------------------|---------------------------------------------------------|--------------------------------------|--------------------------------------------------------------------------|
| PY79               | Prototrophic                                            | -                                    | (Youngman, Perkins, & Losick, 1984)                                      |
| LAM494.5           | PY79 <i>dnaD23</i>                                      | -                                    | This study; mutation based on (Bruand, Sorokin, Serror, & Ehrlich, 1995) |
| LAM513             | PY79 <i>dnaD23 amyE::P<sub>xyI</sub>-dnaDF51A (erm)</i> | Full-length DnaD F51A                | This study                                                               |
| LAM497             | PY79 <i>dnaD23 amyE::P<sub>xyI</sub>-dnaDI83A (erm)</i> | Full-length DnaD I83A                | This study                                                               |
| LAM477             | PY79 <i>dnaD23 amyE::P<sub>xyI</sub>-dnaD (erm)</i>     | Full-length DnaD                     | This study                                                               |



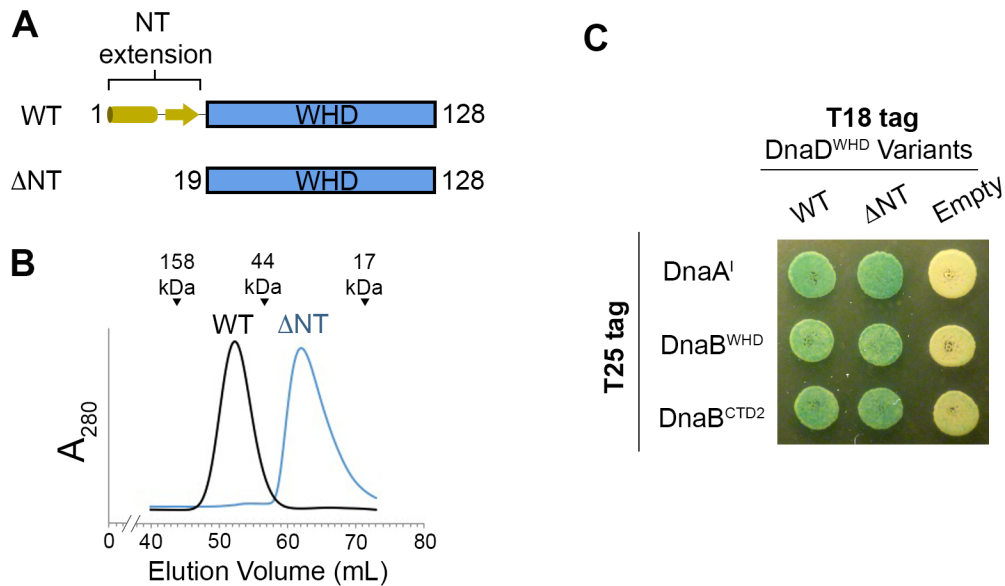

**Figure S2. The DnaD<sup>WHD</sup> NT Extension is Not Necessary for Protein Interactions.**

**(A)** Schematic of DnaD<sup>WHD</sup> showing the N-terminal extension (residues 1-18) that mediates tetramerization. **(B)** Size exclusion chromatogram of either wild type DnaD<sup>WHD</sup> (black) or the  $\Delta$ NT variant (blue) with elution volume (mL) labeled on the x-axis and absorbance at 280 nm ( $A_{280}$ ) labeled on the y-axis. The  $\Delta$ NT variant elutes later than expected for the tetramer (size of the  $\Delta$ NT tetramer is 51.9 kDa) demonstrating that this truncation has shifted the equilibrium to favor the dimer. **(C)** B2H of T18-tagged wild type DnaD<sup>WHD</sup> or the  $\Delta$ NT variant co-expressed with T25-tagged DnaA<sup>DI</sup>, DnaB<sup>WHD</sup> or DnaB<sup>CTD2</sup>.



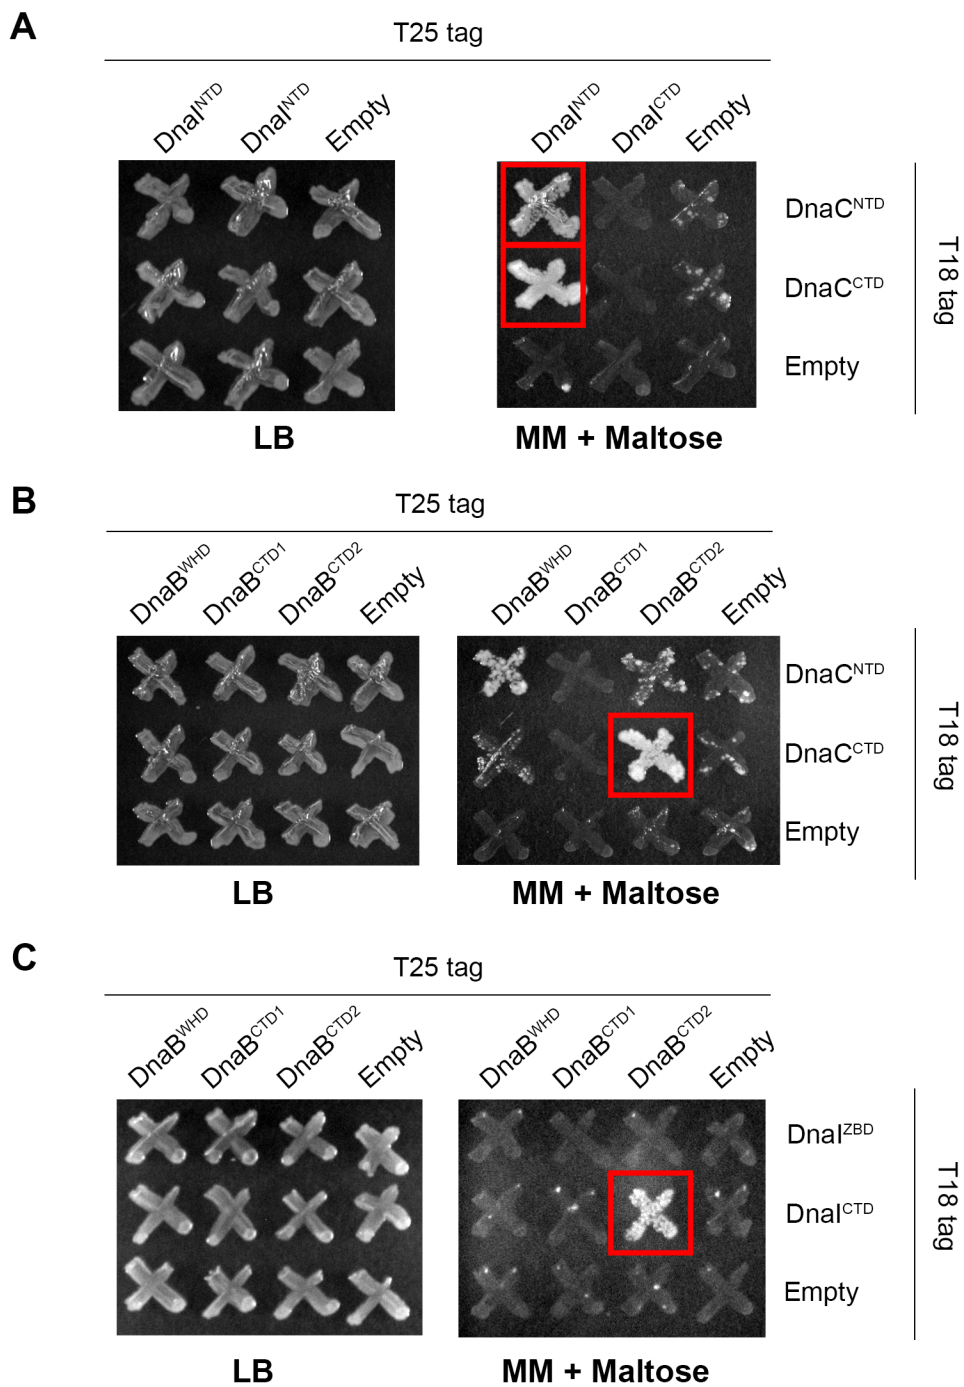

**Figure S3. Detecting Interactions with the DnaC Helicase Using Minimal Media with Maltose.**

**Figure S3 continued**

**(A)** B2H of T18-tagged DnaC domains co-expressed with T25-tagged DnaI domains. **(B)** B2H of T18-tagged DnaC domains co-expressed with T25-tagged DnaB domains. **(C)** B2H of T25-tagged DnaB domains co-expressed with T18-tagged DnaI domains. The cells were grown on LB or minimal media supplemented with 0.2% D-maltose (MM + Maltose). Red boxes indicate positive interactions.

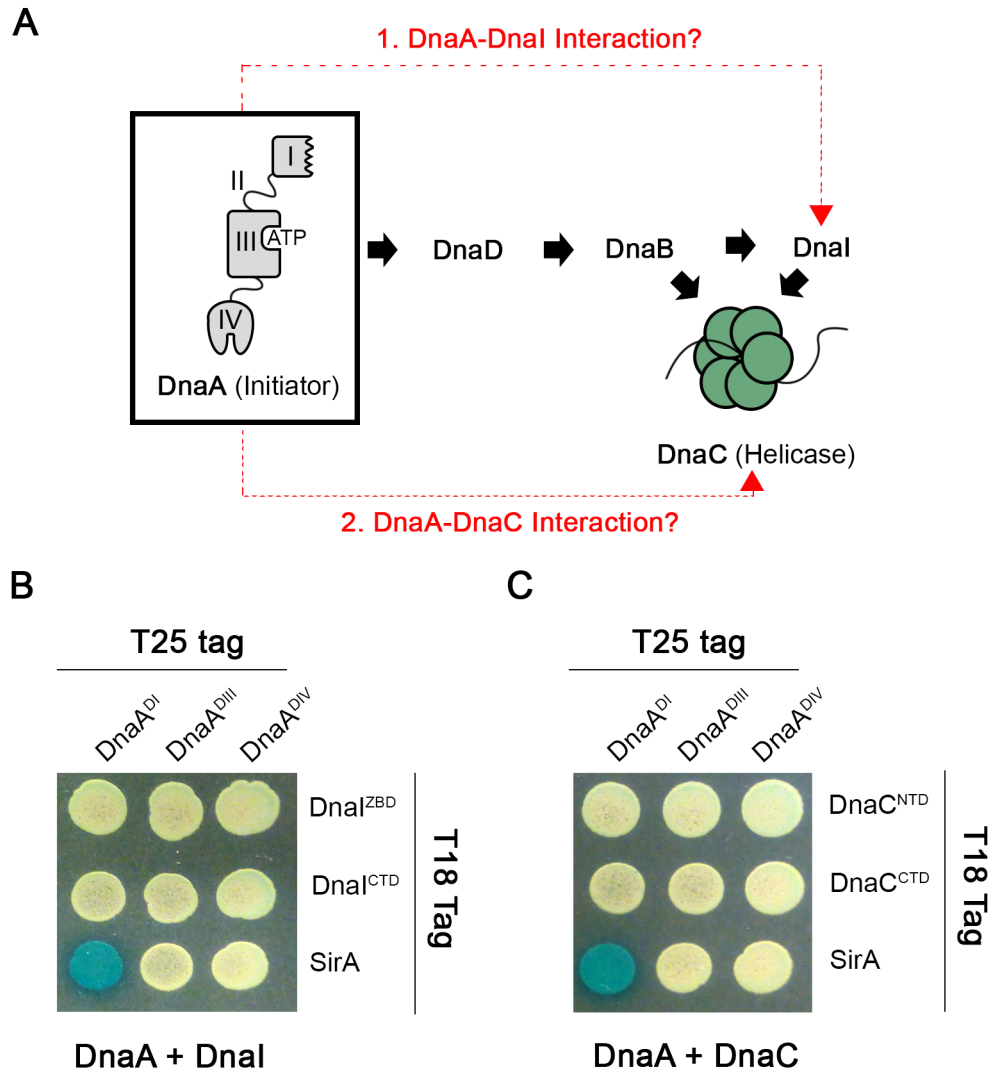

**Figure S4. *B. subtilis* DnaA Cannot Bind Dnal or DnaC.**

(A) Schematic of the *B. subtilis* helicase loading pathway with red arrows indicating the interactions tested in the B2H assay and black arrows indicating known protein interactions. (B) B2H of T25-tagged DnaA domains co-expressed with T18-tagged Dnal domains. (C) B2H of T25-tagged DnaA domains co-expressed with T18-tagged DnaC domains. SirA is included as a positive control.

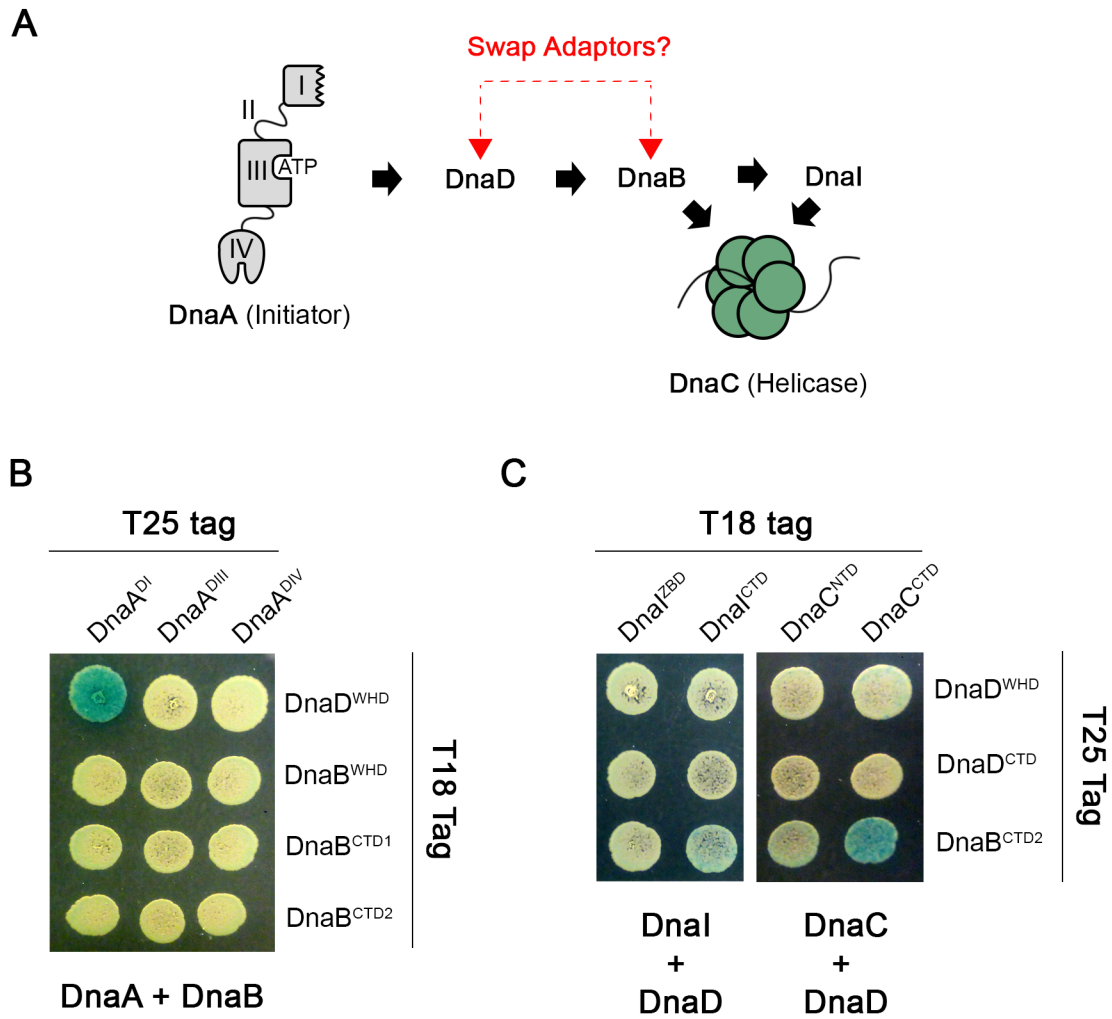

**Figure S5. DnaD and DnaB Cannot Substitute for Each Other in the B2H Assay.**

**(A)** Schematic of the *B. subtilis* helicase loading pathway with known interactions indicated by black arrows. **(B)** B2H of T25-tagged DnaA domains co-expressed with T18-tagged DnaB domains. The DnaD<sup>WHD</sup> domain is included as a positive control. **(C)** B2H of T18-tagged DnaI domains (left) or DnaC domains (right) co-expressed with T25-tagged DnaD domains. The DnaB<sup>CTD2</sup> domain is included as a positive control.

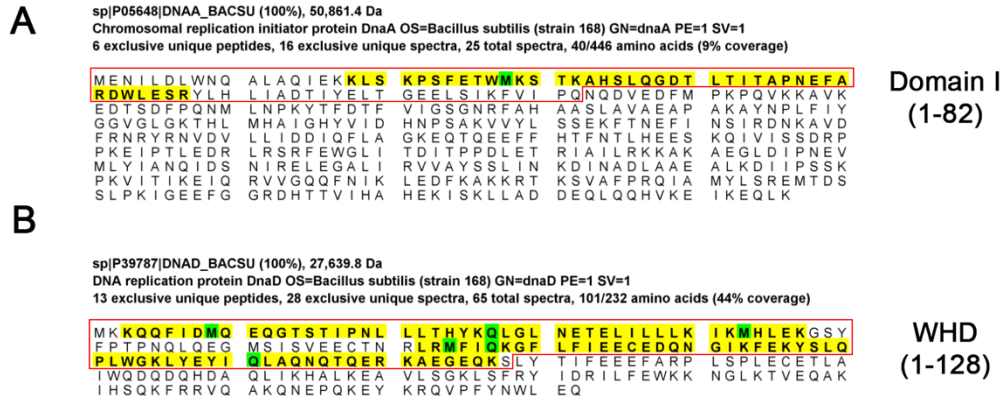

**Figure S6. Mass Spectrometry Results for the DnaD<sup>WHD</sup>-DnaA<sup>DI</sup> Crosslinked Band.**

Both DnaA (**A**) and DnaD (**B**) were detected in the crosslinked band. Identified peptides are highlighted in yellow with the boundaries of the DnaD<sup>WHD</sup> and DnaA<sup>DI</sup> domains marked with red lines. Note that only the isolated DnaD<sup>WHD</sup> and DnaA<sup>DI</sup> were used in the crosslinking experiment. The mass spectrometry was performed by MS Bioworks (Ann Arbor, MI, [www.msbioworks.com](http://www.msbioworks.com)).

## References

Bruand, C., Sorokin, A., Serror, P., & Ehrlich, S. D. (1995). Nucleotide sequence of the

*Bacillus subtilis dnaD* gene. *Microbiology*, 141(Pt 2), 321–322.

Youngman, P., Perkins, J. B., & Losick, R. (1984). Construction of a cloning site near

one end of Tn917 into which foreign DNA may be inserted without affecting

transposition in *Bacillus subtilis* or expression of the transposon-borne *erm* gene.

*Plasmid*, 12(1), 1–9.
